# Supplementary material
Source: Springer Nature journal article supplement (https://www.springermedizin.de/resource/supplementary/12874_2004_101_MOESM6_ESM.pdf/9433768)

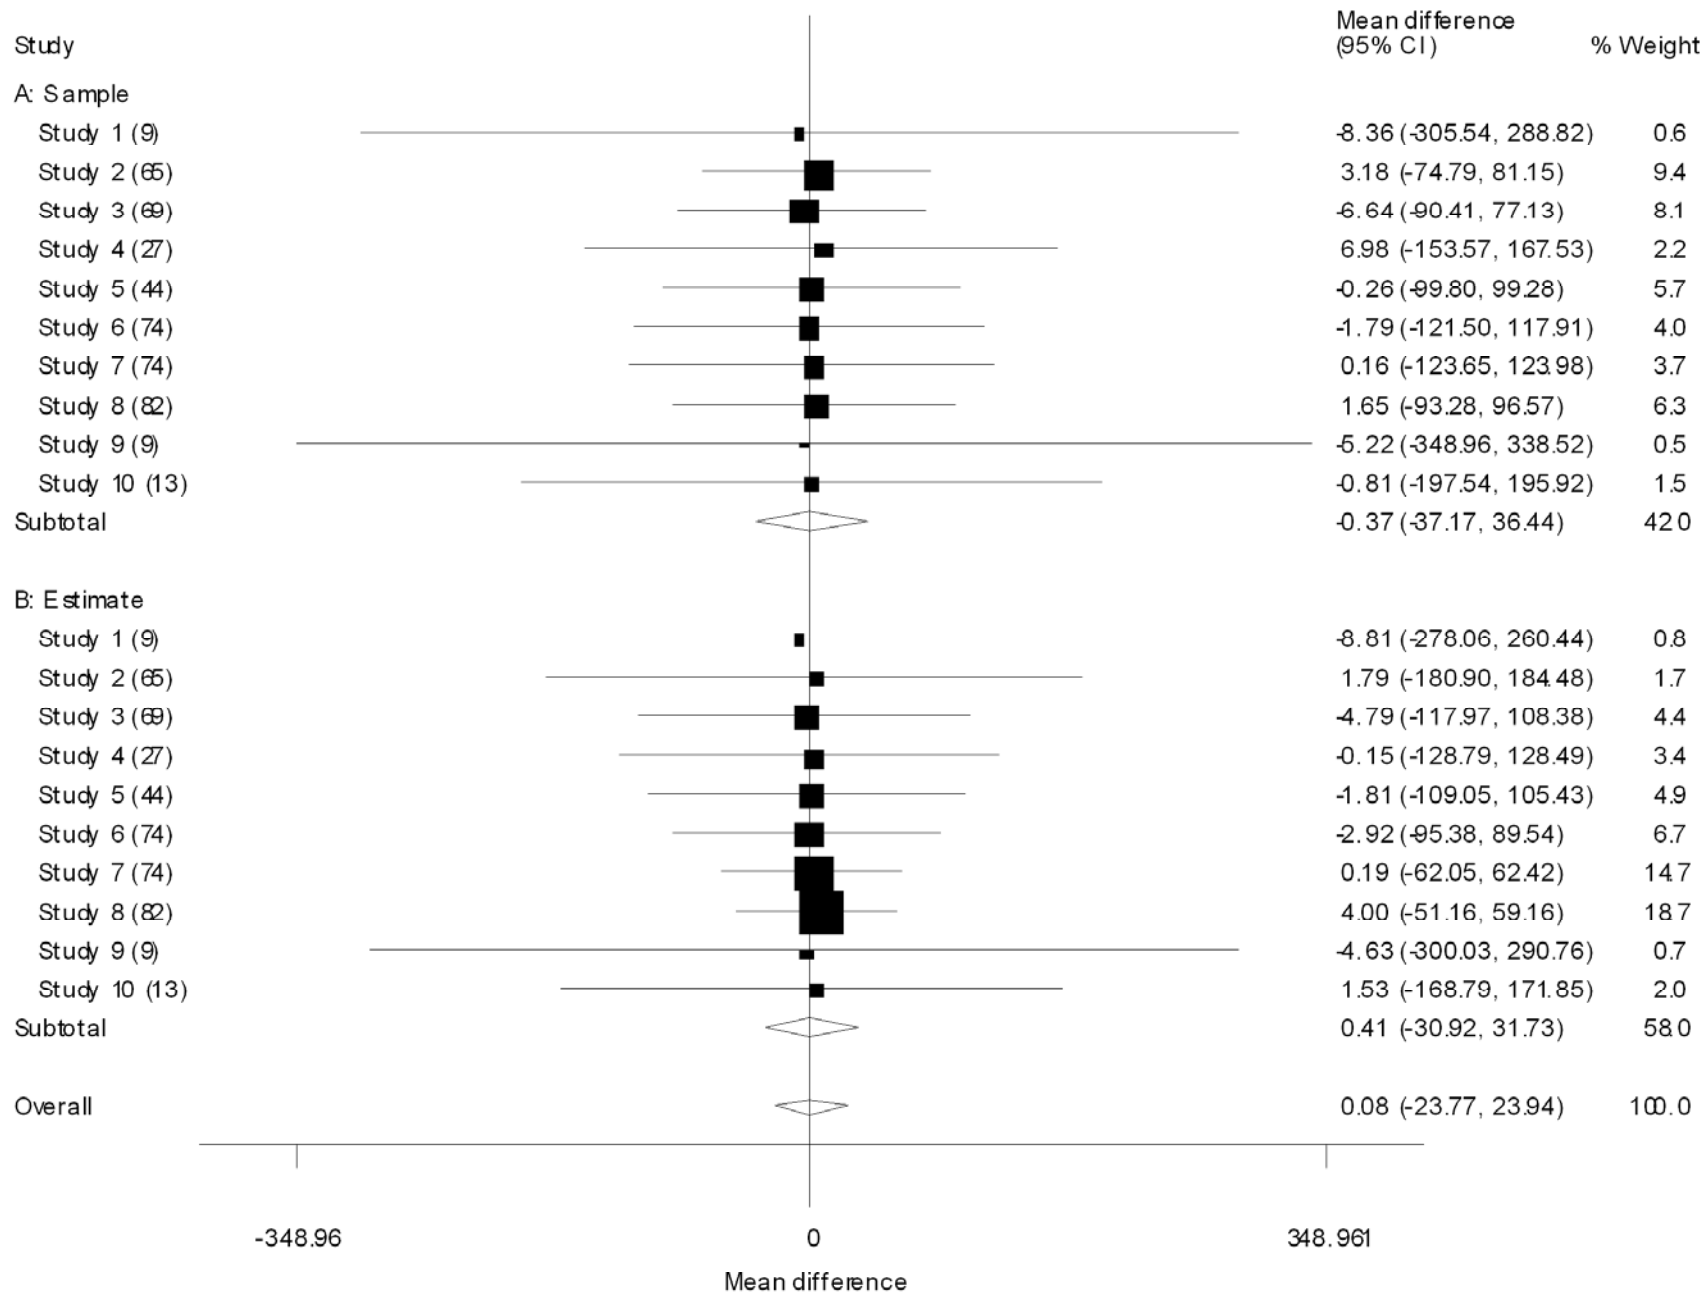

Supplement: MOESM6 [file 9433768]
